# Supplementary material
Source: Springer Nature journal article supplement (https://www.springermedizin.de/resource/supplementary/12888_2013_1567_MOESM1_ESM.pdf/9481396)
Supplement: MOESM1 [file 9481396]

## Enrollment

Assessed for eligibility and  
approached for consent (n=222)

Excluded (total) (n=15)

- Declined to participate (n=15 )

Recruited (n=207)

Lost to follow-up (total) (n=59)

- Withdrew consent (n=6 )
- Discharged from service (n=41)
- Untraceable (n= 2)
- Died (n=2; one accidental fall, one liver cancer)
- Transferred to other region (n=6)
- Self-discharged from service (n=2 )

## Follow-Up(One Year)

## Analysis

Analysed (n=148)

- Excluded from analysis (give reasons) (n=0 )
